# Supplementary material for: In the pursuit of a ‘disappearing’ anhydrous phase of the antipyrine–dipicolinic acid (ANT–DPA) co-crystal: explained through relative stability and charge density analyses
Source: Royal Society of Chemistry journal article supplement (doi:10.1039/d3ce00591g), 2023-01-01
Supplement: d3ce00591g1.pdf [file d3ce00591g1.pdf]

### Supporting Information for

## In the pursuit of a ‘disappearing’ anhydrous phase of antipyrine-dipicolinic acid (ANT-DPA) co-crystal: explained through relative stability and charge density analyses

Sehrish Akram<sup>a</sup>, Arshad Mehmood<sup>\*b</sup>, Sajida Noureen<sup>a</sup>, Maqsood Ahmed<sup>\*a</sup>

<sup>a</sup>Materials Chemistry Laboratory, Institute of Chemistry, The Islamia University of Bahawalpur, Baghdad-ul-Jadeed Campus 63100, Pakistan.

<sup>b</sup>Department of Chemistry and Biochemistry, Texas Christian University, Fort Worth, Texas 76129, USA.

Correspondence : [arshad.mehmood@stonybrook.edu](mailto:arshad.mehmood@stonybrook.edu); [maqsood.ahmed@iub.edu.pk](mailto:maqsood.ahmed@iub.edu.pk)

**Table S1** Experimental and theoretical lattice parameters of both cocrystals. Theoretical parameters are obtained from periodic DFT calculations.

| Parameter                | Hydrated form |         | Anhydrous form |         |
|--------------------------|---------------|---------|----------------|---------|
|                          | Experiment    | Theory  | Experiment     | Theory  |
| <i>a</i> (Å)             | 18.4087       | 18.2524 | 6.6207         | 6.5349  |
| <i>b</i> (Å)             | 8.0394        | 8.0759  | 13.4523        | 13.3528 |
| <i>c</i> (Å)             | 23.69         | 23.2077 | 36.69120       | 36.6821 |
| $\beta$ (°)              | 91.284        | 89.5857 | -              | -       |
| Volume (Å <sup>3</sup> ) | 3505.1        | 3420.81 | 3267.9         | 3051.88 |

**Table S2.** Bader charges of individual atoms of both cocrystals obtained from periodic DFT calculations.

| Hydrated form |        | Anhydrous form |        |
|---------------|--------|----------------|--------|
| Atom          | Charge | Atom           | Charge |
| O1            | -1.199 | O1             | -1.223 |
| O2            | -1.196 | O2             | -1.179 |
| O3            | -1.200 | N3             | -1.130 |
| O4            | -1.177 | N1             | -0.822 |
| O5            | -1.174 | O4             | -1.165 |
| O6            | -1.213 | N2             | -0.810 |
| N1            | -0.820 | O3             | -1.197 |
| N2            | -0.801 | C2             | -0.002 |
| N3            | -1.119 | H2A            | 0.087  |
| C1            | 0.296  | C3             | 0.407  |
| C2            | -0.017 | C14            | 0.508  |
| H2            | 0.064  | C1             | 1.208  |
| C3            | -0.033 | O5             | -1.192 |

|      |        |     |        |
|------|--------|-----|--------|
| H3   | 0.062  | C6  | 0.312  |
| C4   | -0.043 | C10 | 0.505  |
| H4a  | 0.077  | C4  | -0.019 |
| C5   | -0.028 | C15 | 1.561  |
| H5   | 0.075  | C13 | 0.002  |
| C6   | 0.004  | H13 | 0.076  |
| H6   | 0.078  | C5  | 0.330  |
| C7   | 0.420  | C12 | 0.001  |
| C8   | -0.005 | H12 | 0.130  |
| H8   | 0.092  | C9  | -0.026 |
| C9   | 1.174  | H9  | 0.073  |
| C10  | 0.302  | C11 | -0.002 |
| C11  | 0.000  | H11 | 0.089  |
| C12  | 0.496  | C16 | 1.582  |
| C13  | -0.003 | C7  | -0.012 |
| H13  | 0.108  | H7  | 0.096  |
| C14  | -0.009 | C8  | -0.017 |
| H14  | 0.072  | H8  | 0.019  |
| C15  | -0.011 | H2  | 0.662  |
| H15  | 0.106  | H4  | 0.659  |
| C16  | 0.490  | H1  | 0.047  |
| C17  | 1.568  | H3  | 0.109  |
| C18  | 1.602  | H5  | 0.070  |
| H6a  | 0.611  | H6  | 0.057  |
| H1   | 0.655  |     |        |
| H6b  | 0.615  |     |        |
| H4   | 0.662  |     |        |
| H11a | 0.068  |     |        |
| H11b | 0.063  |     |        |
| H11c | 0.072  |     |        |
| H10a | 0.083  |     |        |
| H10b | 0.061  |     |        |
| H10c | 0.081  |     |        |

**Table S3**

Hydrogen-bond geometry (Å, °) of hydrated form

| $D-H\cdots A$                      | $D-H$ | $H\cdots A$ | $D\cdots A$ | $D-H\cdots A$ |
|------------------------------------|-------|-------------|-------------|---------------|
| C4—H4a $\cdots$ O5 <sup>i</sup>    | 1.09  | 2.42        | 3.348 (2)   | 142 (1)       |
| C6—H6 $\cdots$ O1                  | 1.09  | 2.58        | 3.007 (2)   | 102 (1)       |
| O2—H1 $\cdots$ O1                  | 1.11  | 1.38        | 2.4378 (17) | 157 (1)       |
| O2—H1 $\cdots$ C8                  | 1.11  | 2.51        | 3.265 (2)   | 124 (1)       |
| O2—H1 $\cdots$ C9                  | 1.11  | 2.06        | 3.089 (2)   | 154 (1)       |
| O6—H6b $\cdots$ O3                 | 0.99  | 1.89        | 2.8767 (17) | 176 (1)       |
| O6—H6b $\cdots$ N3                 | 0.99  | 2.44        | 2.9060 (18) | 108 (1)       |
| O4—H4 $\cdots$ O6                  | 1.02  | 1.74        | 2.6588 (17) | 148 (1)       |
| O4—H4 $\cdots$ N3                  | 1.02  | 2.14        | 2.7132 (18) | 114 (1)       |
| C10—H10c $\cdots$ C11              | 1.09  | 2.62        | 3.036 (3)   | 102 (1)       |
| C11—H11c $\cdots$ O3 <sup>ii</sup> | 1.10  | 2.60        | 3.560 (2)   | 147 (1)       |
| C10—H10c $\cdots$ C5 <sup>ii</sup> | 1.09  | 2.42        | 3.423 (3)   | 152 (1)       |
| C15—H15 $\cdots$ C3 <sup>iii</sup> | 1.09  | 2.78        | 3.565 (3)   | 129 (1)       |
| O6—H6a $\cdots$ O3 <sup>iv</sup>   | 0.98  | 1.95        | 2.8604 (17) | 153 (1)       |
| C3—H3 $\cdots$ N3 <sup>v</sup>     | 1.09  | 2.38        | 3.328 (2)   | 144 (1)       |
| C6—H6 $\cdots$ C14 <sup>vi</sup>   | 1.09  | 2.67        | 3.564 (3)   | 139 (1)       |

Symmetry codes: (i)  $x - \frac{1}{2}, -y + \frac{1}{2}, z - \frac{1}{2}$ ; (ii)  $x, y + 1, z$ ; (iii)  $x + \frac{1}{2}, -y + \frac{3}{2}, z + \frac{1}{2}$ ; (iv)  $-x + \frac{3}{2}, -y + \frac{1}{2}, -z + 1$ ; (v)  $-x + 1, -y + 1, -z + 1$ ; (vi)  $-x + \frac{3}{2}, -y + \frac{3}{2}, -z + 1$

**Table S4**

Topological properties of (3,-1) CPs in the intermolecular interactions of hydrated form calculated based on a multipolar atom model refinement using theoretically generated structure factors. distances (Å), electron density ( $e\text{Å}^{-3}$ ), Laplacian ( $e\text{Å}^{-5}$ ), Hessian eigenvalues ( $e\text{Å}^{-5}$ ),  $\varepsilon$  = ellipticity,  $G_{CP}$  = bond kinetic-energy density ( $\text{kJ mol}^{-1} \text{Bohr}^{-3}$ ) and  $V_{CP}$  = bond potential-energy density ( $\text{kJ mol}^{-1} \text{Bohr}^{-3}$ ).

| No | Bonds                | $d_{12}$ | $d_{1CP}$ | $d_{2CP}$ | $\rho_{BCP}(\mathbf{r})$ | $\nabla^2 \rho_{BCP}(\mathbf{r})$ | $\lambda_1$ | $\lambda_2$ | $\lambda_3$ | $\varepsilon$ | $G_{CP}$ | $V_{CP}$ |
|----|----------------------|----------|-----------|-----------|--------------------------|-----------------------------------|-------------|-------------|-------------|---------------|----------|----------|
| 1  | O2 - H1 $\cdots$ O1  | 1.334    | 0.977     | 0.357     | 0.730                    | 2.43                              | -7.176      | -7.113      | 16.72       | 0.009         | 229.2    | -392.2   |
|    |                      | 1.334    | 0.942     | 0.393     | 0.894                    | -4.264                            | -8.942      | -8.887      | 13.57       | 0.006         | 182.1    | -480.3   |
| 2  | O4 - H4 $\cdots$ O6  | 1.687    | 1.130     | 0.560     | 0.331                    | 1.578                             | -2.323      | -2.289      | 6.19        | 0.015         | 78.32    | -113.6   |
|    |                      | 1.687    | 1.118     | 0.572     | 0.357                    | 1.188                             | -2.287      | -2.285      | 5.76        | 0.001         | 77.68    | -123.0   |
| 3  | O6 - H6b $\cdots$ O3 | 1.894    | 1.193     | 0.702     | 0.241                    | 1.155                             | -1.509      | -1.509      | 4.172       | 0             | 50.15    | -68.84   |
|    |                      | 1.894    | 1.191     | 0.704     | 0.228                    | 1.069                             | -1.312      | -1.308      | 3.688       | 0.003         | 45.96    | -62.81   |

|    |                             |       |       |       |       |       |        |        |       |       |       |        |
|----|-----------------------------|-------|-------|-------|-------|-------|--------|--------|-------|-------|-------|--------|
| 4  | O6 - H6a <sup>iv</sup> O3   | 1.938 | 0.738 | 1.208 | 0.204 | 1.299 | -1.2   | -1.172 | 3.671 | 0.024 | 45.65 | -55.93 |
|    |                             | 1.938 | 0.737 | 1.209 | 0.204 | 1.297 | -1.2   | -1.17  | 3.67  | 0.025 | 45.64 | -55.95 |
| 5  | C3 - H3 <sup>v</sup> N3     | 2.397 | 0.948 | 1.449 | 0.075 | 0.963 | -0.278 | -0.227 | 1.467 | 0.225 | 21.7  | -17.17 |
|    |                             | 2.397 | 0.948 | 1.449 | 0.075 | 0.964 | -0.28  | -0.23  | 1.47  | 0.225 | 21.72 | -17.19 |
| 6  | C10 - H10c <sup>ii</sup> C5 | 2.447 | 0.969 | 1.478 | 0.074 | 0.817 | -0.24  | -0.182 | 1.239 | 0.322 | 18.9  | -15.54 |
|    |                             | 2.447 | 0.969 | 1.479 | 0.074 | 0.817 | -0.24  | -0.18  | 1.24  | 0.321 | 18.91 | -15.56 |
| 7  | C4 - H4a <sup>i</sup> O5    | 2.394 | 0.969 | 1.426 | 0.064 | 0.899 | -0.252 | -0.24  | 1.391 | 0.052 | 19.53 | -14.56 |
|    |                             | 2.394 | 0.969 | 1.426 | 0.064 | 0.903 | -0.25  | -0.24  | 1.4   | 0.051 | 19.59 | -14.58 |
| 8  | C6 - H6 <sup>vi</sup> C14   | 2.659 | 1.061 | 1.613 | 0.051 | 0.553 | -0.155 | -0.08  | 0.788 | 0.932 | 12.25 | -9.44  |
|    |                             | 2.659 | 1.061 | 1.613 | 0.051 | 0.554 | -0.16  | -0.08  | 0.79  | 0.934 | 12.28 | -9.46  |
| 9  | C11 - H11c <sup>ii</sup> O3 | 2.582 | 1.080 | 1.504 | 0.044 | 0.589 | -0.164 | -0.139 | 0.892 | 0.182 | 12.43 | -8.82  |
|    |                             | 2.582 | 1.079 | 1.504 | 0.044 | 0.592 | -0.16  | -0.14  | 0.9   | 0.182 | 12.48 | -8.84  |
| 10 | C15 - H15 <sup>iii</sup> C3 | 2.769 | 1.124 | 1.647 | 0.037 | 0.472 | -0.097 | -0.056 | 0.626 | 0.734 | 9.85  | -6.84  |
|    |                             | 2.769 | 1.124 | 1.648 | 0.037 | 0.473 | -0.1   | -0.06  | 0.63  | 0.734 | 9.87  | -6.86  |
| 11 | C11 - H11b <sup>i</sup> O1  | 2.688 | 1.137 | 1.552 | 0.035 | 0.516 | -0.112 | -0.068 | 0.696 | 0.637 | 10.53 | -7     |
|    |                             | 2.688 | 1.137 | 1.552 | 0.035 | 0.519 | -0.11  | -0.07  | 0.7   | 0.638 | 10.57 | -7.02  |
| 12 | C3 - H3 <sup>v</sup> O6     | 2.683 | 1.126 | 1.564 | 0.034 | 0.545 | -0.093 | -0.049 | 0.686 | 0.901 | 10.98 | -7.13  |
|    |                             | 2.683 | 1.126 | 1.564 | 0.033 | 0.547 | -0.09  | -0.05  | 0.69  | 0.894 | 11.02 | -7.14  |
| 13 | C8 - H8 <sup>vi</sup> O6    | 2.756 | 1.157 | 1.600 | 0.033 | 0.382 | -0.112 | -0.101 | 0.594 | 0.111 | 7.99  | -5.59  |
|    |                             | 2.756 | 1.157 | 1.600 | 0.033 | 0.383 | -0.11  | -0.1   | 0.6   | 0.11  | 8.02  | -5.6   |
| 14 | C5 - H5 <sup>v</sup> O5     | 2.767 | 1.169 | 1.598 | 0.031 | 0.364 | -0.107 | -0.092 | 0.563 | 0.166 | 7.59  | -5.26  |
|    |                             | 2.767 | 1.169 | 1.598 | 0.031 | 0.366 | -0.11  | -0.09  | 0.56  | 0.164 | 7.62  | -5.26  |
| 15 | C8 - H8 <sup>vi</sup> O3    | 2.836 | 1.342 | 1.590 | 0.031 | 0.478 | -0.076 | -0.051 | 0.604 | 0.491 | 9.62  | -6.23  |
|    |                             | 2.836 | 1.342 | 1.590 | 0.031 | 0.48  | -0.08  | -0.05  | 0.61  | 0.489 | 9.66  | -6.25  |
| 16 | C11 - H11a <sup>iv</sup> C6 | 2.912 | 1.195 | 1.721 | 0.031 | 0.339 | -0.081 | -0.053 | 0.473 | 0.537 | 7.08  | -4.94  |
|    |                             | 2.912 | 1.195 | 1.721 | 0.031 | 0.339 | -0.08  | -0.05  | 0.47  | 0.534 | 7.1   | -4.95  |
| 17 | C10 - H10a <sup>v</sup> O5  | 2.742 | 1.242 | 1.540 | 0.030 | 0.56  | -0.09  | -0.064 | 0.714 | 0.406 | 11.06 | -6.88  |
|    |                             | 2.742 | 1.242 | 1.54  | 0.030 | 0.562 | -0.09  | -0.06  | 0.72  | 0.406 | 11.11 | -6.9   |
| 18 | C13 - H13 <sup>vi</sup> O6  | 2.739 | 1.157 | 1.585 | 0.029 | 0.403 | -0.099 | -0.087 | 0.589 | 0.135 | 8.18  | -5.4   |
|    |                             | 2.739 | 1.157 | 1.585 | 0.029 | 0.405 | -0.1   | -0.09  | 0.59  | 0.136 | 8.22  | -5.41  |
| 19 | C5 - H5 <sup>v</sup> O4     | 2.789 | 1.182 | 1.609 | 0.026 | 0.456 | -0.081 | -0.035 | 0.572 | 1.312 | 9.01  | -5.59  |
|    |                             | 2.789 | 1.182 | 1.609 | 0.026 | 0.458 | -0.08  | -0.04  | 0.57  | 1.295 | 9.04  | -5.6   |
| 20 | C10 - H10b <sup>v</sup> O2  | 2.769 | 1.168 | 1.604 | 0.026 | 0.424 | -0.087 | -0.063 | 0.574 | 0.389 | 8.43  | -5.3   |
|    |                             | 2.769 | 1.168 | 1.604 | 0.026 | 0.426 | -0.09  | -0.06  | 0.58  | 0.390 | 8.46  | -5.3   |
| 21 | C11 - H11a <sup>iv</sup> O1 | 2.84  | 1.254 | 1.607 | 0.026 | 0.469 | -0.082 | -0.041 | 0.592 | 1.016 | 9.22  | -5.65  |
|    |                             | 2.84  | 1.255 | 1.606 | 0.025 | 0.472 | -0.08  | -0.04  | 0.59  | 1.016 | 9.25  | -5.66  |
| 22 | C10 - H10a <sup>v</sup> O5  | 2.895 | 1.203 | 1.730 | 0.025 | 0.392 | -0.063 | -0.029 | 0.485 | 1.145 | 7.8   | -4.9   |
|    |                             | 2.895 | 1.204 | 1.730 | 0.025 | 0.394 | -0.06  | -0.03  | 0.49  | 1.162 | 7.82  | -4.91  |
| 23 | C2 - H2 <sup>vi</sup> O6    | 2.842 | 1.219 | 1.630 | 0.024 | 0.438 | -0.068 | -0.037 | 0.543 | 0.872 | 8.57  | -5.21  |
|    |                             | 2.842 | 1.219 | 1.630 | 0.024 | 0.44  | -0.07  | -0.04  | 0.54  | 0.877 | 8.6   | -5.22  |
| 24 | C14 - H14 <sup>iv</sup> C4  | 3.068 | 1.236 | 1.837 | 0.021 | 0.336 | -0.053 | -0.024 | 0.414 | 1.202 | 6.6   | -4.04  |
|    |                             | 3.068 | 1.236 | 1.837 | 0.021 | 0.337 | -0.05  | -0.02  | 0.42  | 1.201 | 6.62  | -4.05  |
| 25 | C11 - H11a <sup>v</sup> O4  | 2.903 | 1.243 | 1.660 | 0.021 | 0.332 | -0.058 | -0.04  | 0.43  | 0.457 | 6.51  | -3.99  |
|    |                             | 2.903 | 1.243 | 1.659 | 0.021 | 0.333 | -0.06  | -0.04  | 0.43  | 0.457 | 6.53  | -3.99  |
| 26 | C11 - H11c <sup>v</sup> C2  | 3.160 | 1.318 | 1.853 | 0.017 | 0.255 | -0.032 | -0.017 | 0.304 | 0.920 | 4.99  | -3.04  |
|    |                             | 3.160 | 1.318 | 1.853 | 0.017 | 0.256 | -0.03  | -0.02  | 0.3   | 0.923 | 5.01  | -3.05  |
| 27 | C14 - H14 <sup>iv</sup> O4  | 3.052 | 1.392 | 1.707 | 0.015 | 0.278 | -0.043 | -0.022 | 0.343 | 0.966 | 5.35  | -3.12  |
|    |                             | 3.052 | 1.393 | 1.707 | 0.015 | 0.279 | -0.04  | -0.02  | 0.34  | 0.967 | 5.36  | -3.13  |

Symmetry codes: (i)  $x-1/2, -y+1/2, z-1/2$ ; (ii)  $x, y+1, z$ ; (iii)  $x+1/2, -y+3/2, z+1/2$ ; (iv)  $-x+3/2, -y+1/2, -z+1$ ; (v)  $-x+1, -y+1, -z+1$ ; (vi)  $-x+3/2, -y+3/2, -z+1$



**Table S5**

Topological properties of (3,-1) CPs in the intermolecular interactions of hydrated form in the gas phase using the isolated crystal geometry and calculated using Multiwfn: distances ( $\text{\AA}$ ), electron density ( $e\text{\AA}^{-3}$ ), Laplacian ( $e\text{\AA}^{-5}$ ), Hessian eigenvalues ( $e\text{\AA}^{-5}$ ),  $\varepsilon$  = ellipticity,  $G_{\text{CP}}$  = bond kinetic-energy density ( $\text{kJ mol}^{-1} \text{Bohr}^{-3}$ ) and  $V_{\text{CP}}$  = bond potential-energy density ( $\text{kJ mol}^{-1} \text{Bohr}^{-3}$ ).

| No | Bonds                | $d_{12}$ | $d_{1\text{CP}}$ | $d_{2\text{CP}}$ | $\rho_{\text{BCP}}(\mathbf{r})$ | $\nabla^2 \rho_{\text{BCP}}(\mathbf{r})$ | $\lambda_1$ | $\lambda_2$ | $\lambda_3$ | $\varepsilon$ | $G_{\text{CP}}$ | $V_{\text{CP}}$ |
|----|----------------------|----------|------------------|------------------|---------------------------------|------------------------------------------|-------------|-------------|-------------|---------------|-----------------|-----------------|
| 1  | O2 - H1 $\cdots$ O1  | 1.282    | 0.947            | 0.336            | 0.870                           | 0.673                                    | -9.116      | -8.962      | 17.41       | 0.017         | 233.3           | -448.3          |
| 2  | O4 - H4 $\cdots$ O6  | 1.836    | 1.190            | 0.647            | 0.226                           | 2.867                                    | -1.230      | -1.166      | 5.26        | 0.055         | 81.19           | -84.28          |
| 3  | O6 - H6b $\cdots$ O3 | 1.997    | 1.268            | 0.729            | 0.155                           | 1.892                                    | -0.746      | -0.731      | 3.369       | 0.020         | 53.01           | -54.47          |

**Table S6**Hydrogen-bond geometry ( $\text{\AA}$ ,  $^\circ$ ) of an anhydrous form

| $D-H\cdots A$                      | $D-H$ | $H\cdots A$ | $D\cdots A$ | $D-H\cdots A$ |
|------------------------------------|-------|-------------|-------------|---------------|
| C15—H15 $\cdots$ C11 <sup>i</sup>  | 0.99  | 2.75        | 3.571 (3)   | 141 (1)       |
| C14—H14 $\cdots$ O3 <sup>ii</sup>  | 1.04  | 2.43        | 3.472 (3)   | 175 (1)       |
| C2—H2 $\cdots$ O5 <sup>iii</sup>   | 0.98  | 2.46        | 3.202 (3)   | 132 (1)       |
| C10—H10C $\cdots$ C11              | 0.99  | 2.62        | 3.049 (3)   | 107 (1)       |
| O4—H4A $\cdots$ O1                 | 0.91  | 1.82        | 2.672 (2)   | 157 (1)       |
| O4—H4A $\cdots$ N3                 | 0.91  | 2.21        | 2.683 (2)   | 112 (1)       |
| O2—H2A $\cdots$ C9                 | 0.93  | 2.70        | 3.416 (3)   | 135 (1)       |
| O2—H2A $\cdots$ O1                 | 0.93  | 1.80        | 2.681 (2)   | 158 (1)       |
| O2—H2A $\cdots$ N3                 | 0.93  | 2.21        | 2.695 (2)   | 112 (1)       |
| C11—H11C $\cdots$ O3 <sup>iv</sup> | 0.97  | 2.39        | 3.351 (3)   | 169 (1)       |
| C11—H11B $\cdots$ O1 <sup>v</sup>  | 1.02  | 2.55        | 3.535 (3)   | 163 (1)       |
| C6—H6 $\cdots$ O5 <sup>v</sup>     | 0.98  | 2.26        | 3.215 (3)   | 166 (1)       |

Symmetry codes: (i)  $x, y-1, z$ ; (ii)  $-x+1/2, y-1/2, z$ ; (iii)  $x, y+1/2, z-1/2$ ; (iv)  $-x+1/2, y+1/2, z$ ; (v)  $x, y+1/2, z+1/2$ .

**Table S7**

Topological properties of (3,-1) CPs in the intermolecular interactions of an anhydrous form experimental values (above) and theoretical values (below): distances ( $\text{\AA}$ ), electron density ( $e\text{\AA}^{-3}$ ), Laplacian ( $e\text{\AA}^{-5}$ ), Hessian eigenvalues ( $e\text{\AA}^{-5}$ ),  $\varepsilon$  = ellipticity,  $G_{\text{CP}}$  = bond kinetic-energy density ( $\text{kJ mol}^{-1} \text{Bohr}^{-3}$ ) and  $V_{\text{CP}}$  = bond potential-energy density ( $\text{kJ mol}^{-1} \text{Bohr}^{-3}$ ).

| No | Bonds                              | $d_{12}$ | $d_{1\text{CP}}$ | $d_{2\text{CP}}$ | $\rho_{\text{BCP}}(\mathbf{r})$ | $\nabla^2 \rho_{\text{BCP}}(\mathbf{r})$ | $\lambda_1$ | $\lambda_2$ | $\lambda_3$ | $\varepsilon$ | $G_{\text{CP}}$ | $V_{\text{CP}}$ |
|----|------------------------------------|----------|------------------|------------------|---------------------------------|------------------------------------------|-------------|-------------|-------------|---------------|-----------------|-----------------|
| 1  | O4—H4A $\cdots$ O1                 | 1.686    | 1.120            | 0.567            | 0.324                           | 1.497                                    | -2.256      | -2.142      | 5.895       | 0.053         | 75              | -109.2          |
|    |                                    | 1.686    | 1.124            | 0.562            | 0.313                           | 2.102                                    | -1.912      | -1.837      | 5.851       | 0.041         | 83.21           | -109.2          |
| 2  | O2—H2A $\cdots$ O1                 | 1.726    | 1.153            | 0.576            | 0.311                           | 1.59                                     | -2.168      | -2.024      | 5.783       | 0.071         | 73.62           | -103.9          |
|    |                                    | 1.726    | 1.135            | 0.592            | 0.301                           | 1.81                                     | -1.883      | -1.783      | 5.475       | 0.056         | 75.09           | -100.9          |
| 3  | C6—H6 $\cdots$ O5 <sup>v</sup>     | 2.219    | 0.893            | 1.327            | 0.097                           | 1.182                                    | -0.42       | -0.413      | 2.014       | 0.017         | 27.91           | -23.62          |
|    |                                    | 2.219    | 0.910            | 1.309            | 0.107                           | 1.186                                    | -0.47       | -0.462      | 2.118       | 0.018         | 29.09           | -25.86          |
| 4  | C11—H11C $\cdots$ O3 <sup>iv</sup> | 2.309    | 0.946            | 1.364            | 0.080                           | 0.979                                    | -0.335      | -0.329      | 1.644       | 0.016         | 22.44           | -18.21          |
|    |                                    | 2.309    | 0.948            | 1.362            | 0.080                           | 0.922                                    | -0.333      | -0.333      | 1.589       | 0.0002        | 21.38           | -17.63          |
| 5  | C14—H14 $\cdots$ O3 <sup>ii</sup>  | 2.384    | 0.959            | 1.425            | 0.070                           | 0.829                                    | -0.294      | -0.29       | 1.413       | 0.014         | 18.79           | -14.99          |
|    |                                    | 2.384    | 0.980            | 1.404            | 0.071                           | 0.858                                    | -0.285      | -0.276      | 1.419       | 0.032         | 19.36           | -15.34          |
| 6  | C2—H2 $\cdots$ O5 <sup>iii</sup>   | 2.401    | 0.993            | 1.409            | 0.061                           | 0.988                                    | -0.231      | -0.171      | 1.39        | 0.352         | 20.86           | -14.81          |

|    |                            |       |       |       |       |       |        |        |       |       |       |        |
|----|----------------------------|-------|-------|-------|-------|-------|--------|--------|-------|-------|-------|--------|
|    |                            | 2.401 | 1.005 | 1.397 | 0.065 | 0.97  | -0.235 | -0.194 | 1.399 | 0.211 | 20.89 | -15.35 |
| 7  | C11—H11B···O1 <sup>v</sup> | 2.484 | 1.022 | 1.463 | 0.059 | 0.703 | -0.215 | -0.211 | 1.129 | 0.021 | 15.54 | -11.93 |
|    |                            | 2.484 | 1.029 | 1.456 | 0.057 | 0.688 | -0.209 | -0.194 | 1.09  | 0.076 | 15.13 | -11.54 |
| 8  | C11—H11A···O4              | 2.645 | 1.111 | 1.536 | 0.040 | 0.628 | -0.129 | -0.082 | 0.838 | 0.584 | 12.88 | -8.67  |
|    |                            | 2.645 | 1.108 | 1.541 | 0.041 | 0.617 | -0.119 | -0.078 | 0.814 | 0.531 | 12.74 | -8.68  |
| 9  | C10—H10A···O5              | 2.630 | 1.104 | 1.534 | 0.037 | 0.666 | -0.12  | -0.06  | 0.847 | 0.992 | 13.4  | -8.67  |
|    |                            | 2.630 | 1.122 | 1.522 | 0.041 | 0.644 | -0.121 | -0.061 | 0.826 | 0.983 | 13.24 | -8.93  |
| 10 | C11—H11B···N3              | 2.803 | 1.235 | 1.609 | 0.037 | 0.598 | -0.09  | -0.044 | 0.731 | 1.061 | 12.14 | -8.01  |
|    |                            | 2.803 | 1.271 | 1.602 | 0.039 | 0.561 | -0.089 | -0.039 | 0.689 | 1.279 | 11.58 | -7.89  |
| 11 | C15—H15···C11 <sup>i</sup> | 2.698 | 1.104 | 1.634 | 0.036 | 0.563 | -0.122 | -0.059 | 0.744 | 1.069 | 11.47 | -7.61  |
|    |                            | 2.698 | 1.085 | 1.617 | 0.046 | 0.574 | -0.119 | -0.084 | 0.777 | 0.425 | 12.24 | -8.85  |
| 12 | C4—H4···O5                 | 2.802 | 1.185 | 1.618 | 0.026 | 0.41  | -0.082 | -0.058 | 0.551 | 0.399 | 8.16  | -5.13  |
|    |                            | 2.802 | 1.211 | 1.592 | 0.027 | 0.409 | -0.078 | -0.065 | 0.552 | 0.213 | 8.19  | -5.24  |
| 13 | C13—H13···C13              | 3.186 | 1.363 | 1.841 | 0.018 | 0.251 | -0.034 | -0.016 | 0.301 | 1.114 | 4.94  | -3.03  |
|    |                            | 3.186 | 1.387 | 1.815 | 0.020 | 0.239 | -0.035 | -0.024 | 0.298 | 0.416 | 4.78  | -3.07  |

Symmetry codes: (i)  $x, y-1, z$ ; (ii)  $-x+1/2, y-1/2, z$ ; (iii)  $x, y+1/2, z-1/2$ ; (iv)  $-x+1/2, y+1/2, z$ ; (v)  $x, y+1/2, z+1/2$ .

**Table S8**

Topological properties of (3,-1) CPs in the intermolecular interactions of an anhydrous form in the gas phase using the isolated crystal geometry and calculated using Multiwfn: distances ( $\text{\AA}$ ), electron density ( $\text{e}\text{\AA}^{-3}$ ), Laplacian ( $\text{e}\text{\AA}^{-5}$ ), Hessian eigenvalues ( $\text{e}\text{\AA}^{-5}$ ),  $\varepsilon$  = ellipticity,  $G_{\text{CP}}$  = bond kinetic-energy density ( $\text{kJ mol}^{-1} \text{Bohr}^{-3}$ ) and  $V_{\text{CP}}$  = bond potential-energy density ( $\text{kJ mol}^{-1} \text{Bohr}^{-3}$ ).

| No | Bonds       | $d_{12}$ | $d_{1\text{CP}}$ | $d_{2\text{CP}}$ | $\rho_{\text{BCP}}(\mathbf{r})$ | $\nabla^2 \rho_{\text{BCP}}(\mathbf{r})$ | $\lambda_1$ | $\lambda_2$ | $\lambda_3$ | $\varepsilon$ | $G_{\text{CP}}$ | $V_{\text{CP}}$ |
|----|-------------|----------|------------------|------------------|---------------------------------|------------------------------------------|-------------|-------------|-------------|---------------|-----------------|-----------------|
| 1  | O4—H4A···O1 | 1.801    | 1.174            | 0.628            | 0.237                           | 2.997                                    | -1.296      | -1.279      | 5.571       | 0.013         | 83.7            | -85.80          |
| 2  | O2—H2A···O1 | 1.816    | 1.175            | 0.643            | 0.222                           | 2.973                                    | -1.185      | -1.165      | 5.323       | 0.017         | 81.6            | -81.74          |



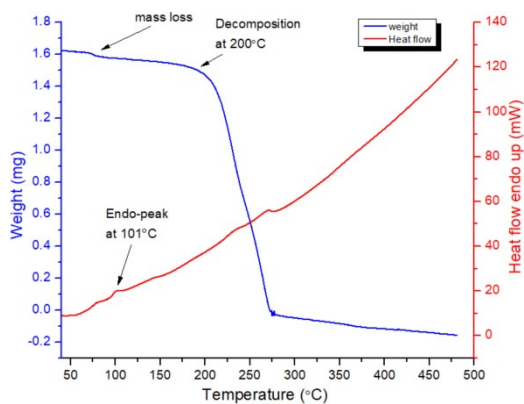

(a)

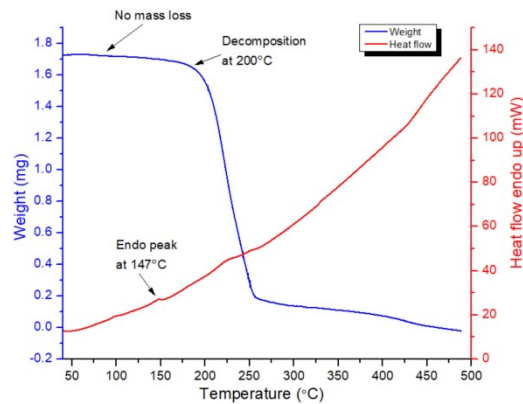

(b)

**Figure S1:** TGA/DSC pattern (upto 500 °C) of the co-crystals showing the events of dehydration, melting and decomposition, (a) hydrated form (b) anhydrous form

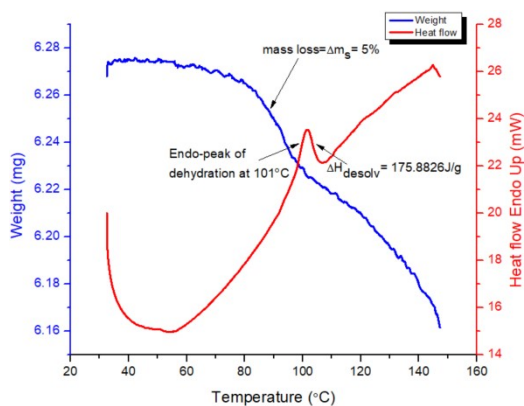

(a)

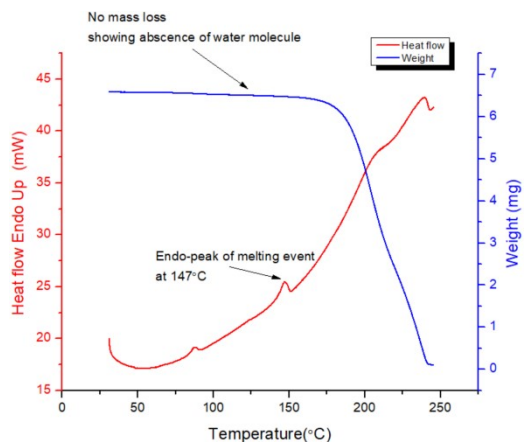

(b)

**Figure S2:** A repetition of the above mentioned TGA/DSC pattern with higher substrate weight for better visualization of the co-crystals showing the event of dehydration (a) hydrated form (upto 150°C) (b) anhydrous form (upto 250°C)

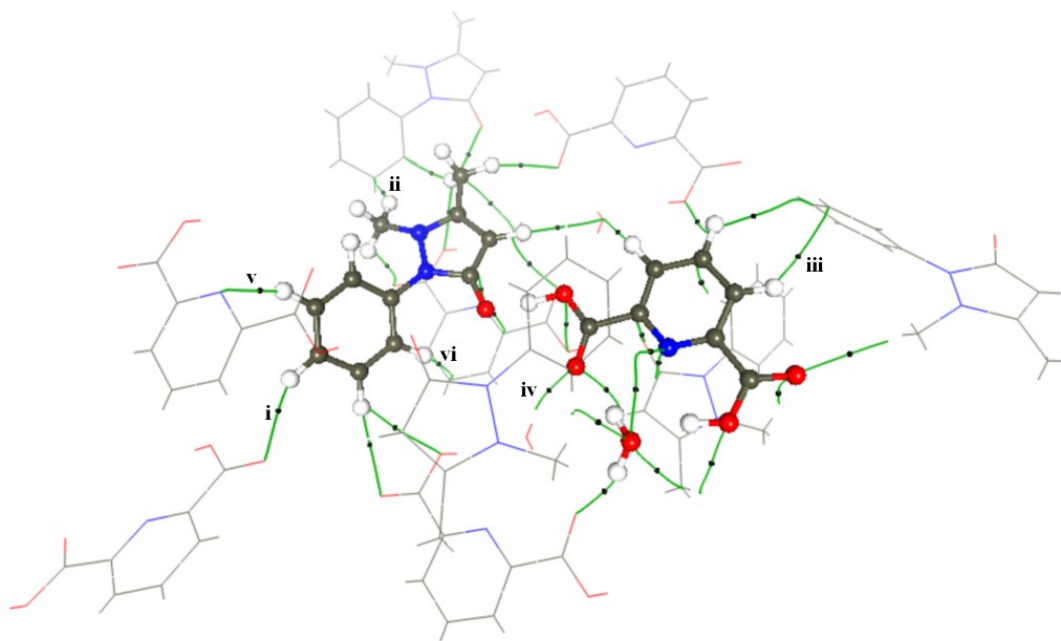

**Figure S3:** A diagram showing the cluster of hydrated form around reference molecule, green lines show bond path and the black dots shows the critical points. Symmetry codes are same as in Table S3.

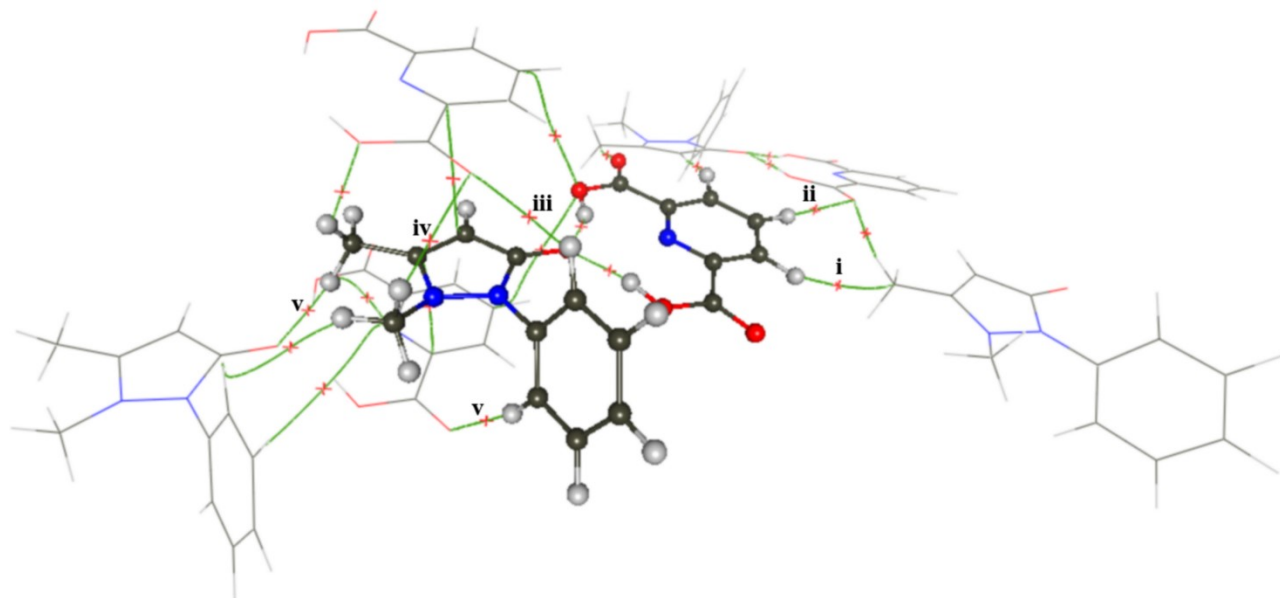

**Figure S4:** A diagram showing the cluster of an anhydrous form around reference molecule, green lines show bond path and the red cross shows the critical points. Symmetry codes are same as in Table S5.
